# Supplementary material for: GUIDE, a structured pre-dialysis programme that increases the use of home dialysis
Source: PubMed Central journal article supplement — Clin Kidney J. 2016 May 30;9(6):826–32. doi: 10.1093/ckj/sfw037 (PMC5162404; doi:10.1093/ckj/sfw037), 2016-05-30
Supplement: supp_sfw037_sfw037supp.pdf [file supp_sfw037_sfw037supp.pdf]

## Supplementary data

Table S1. eGFR decline and timeline

All variables are presented in n (%), unless otherwise specified

| Variable                                                                                                                                                                                                                                                                                                                                                                                                                                                                                                                                                                                                                                                                                                                                                                                          | Results                                                             |
|---------------------------------------------------------------------------------------------------------------------------------------------------------------------------------------------------------------------------------------------------------------------------------------------------------------------------------------------------------------------------------------------------------------------------------------------------------------------------------------------------------------------------------------------------------------------------------------------------------------------------------------------------------------------------------------------------------------------------------------------------------------------------------------------------|---------------------------------------------------------------------|
| eGFR at start of GUIDE (ml/min/1.73m <sup>2</sup> ); mean (SD) (n=98*)<br>No acute decline of renal function (n=84)<br>Acute decline of renal function (n=14)                                                                                                                                                                                                                                                                                                                                                                                                                                                                                                                                                                                                                                     | 12.3 (3.4)<br><b>12.7 (3.3)</b> <b>p=0.012</b><br><b>10.2 (3.7)</b> |
| eGFR at start of first therapy (ml/min/1.73m <sup>2</sup> ); mean (SD) (n=35)                                                                                                                                                                                                                                                                                                                                                                                                                                                                                                                                                                                                                                                                                                                     | 8.1 (3,0)                                                           |
| Time between start of GUIDE and treatment choice in weeks;<br>median (IQR) (n=74**)                                                                                                                                                                                                                                                                                                                                                                                                                                                                                                                                                                                                                                                                                                               | 8.0 (9) Min: 1 Max: 34                                              |
| Time between treatment choice and start of first therapy in weeks;<br>median (IQR) (n=31***)                                                                                                                                                                                                                                                                                                                                                                                                                                                                                                                                                                                                                                                                                                      | 10 (20) Min: -3 Max: 53                                             |
| Time between treatment choice and start of the first therapy (n=76****)<br>Insufficient (< 12 weeks)<br>Sufficient (≥ 12 weeks)<br>Still unknown at end of study (possibly sufficient)                                                                                                                                                                                                                                                                                                                                                                                                                                                                                                                                                                                                            | 17 (22.4%)<br>46 (60.5%)<br>13 (17.1%)                              |
| eGFR at start of GUIDE (ml/min/1.73m <sup>2</sup> ); mean (SD) (n=62)<br>Insufficient time between treatment choice<br>and start of the first therapy<br>Sufficient time between treatment choice<br>and start of the first therapy                                                                                                                                                                                                                                                                                                                                                                                                                                                                                                                                                               | <b>10.1 (3.1)</b> <b>p=0.005</b><br><b>12.7 (3.0)</b>               |
| Time between start of GUIDE and start of first therapy in weeks;<br>median (IQR) (n=31***)                                                                                                                                                                                                                                                                                                                                                                                                                                                                                                                                                                                                                                                                                                        | 19 (21) Min: 2 Max: 57                                              |
| Time between start of first therapy and therapy-switch in weeks;<br>median (IQR) (n=8)                                                                                                                                                                                                                                                                                                                                                                                                                                                                                                                                                                                                                                                                                                            | 20.5 (28) Min: 5 Max: 49                                            |
| <p>* 2 patients, with an eGFR of 30 ml/min/1.73m<sup>2</sup> and 60 ml/min/1.73m<sup>2</sup> were excluded. They started the programme because of acute decline of renal function and because of a planned nephrectomy respectively. For 2 other patients the eGFR at start of GUIDE was unknown.</p> <p>** 10 patients that had an aberrant timeline (e.g. no home visit) because of their early choice for conservative treatment were excluded, as well as 8 patients (4 chose dialysis, 4 chose pre-emptive transplantation) that had made a treatment choice before, or in the same week as the start of GUIDE.</p> <p>*** 6 patients that had started therapy before start of GUIDE were excluded.</p> <p>**** 5 patients that had started therapy before start of GUIDE were excluded.</p> |                                                                     |

**Table S2. Treatment preference of patient, case manager and nephrologist**  
All variables are presented in n (%), unless otherwise specified

|                                                                        |            |
|------------------------------------------------------------------------|------------|
| <i>Therapy preference of patient at the home visit* (n=102)</i>        |            |
| Home dialysis                                                          | 38 (37.3%) |
| In-centre dialysis                                                     | 29 (28.4%) |
| Conservative treatment                                                 | 12 (11.8%) |
| Transplantation                                                        | 7 (6.9%)   |
| No preference/ doubt                                                   | 11 (10.8%) |
| Preference unknown                                                     | 5 (4.9%)   |
| <i>Therapy preference of case manager after the home visit (n=102)</i> |            |
| Suitable for home dialysis                                             | 41 (40.2%) |
| Not suitable for home dialysis                                         | 18 (17.6%) |
| Doubt about suitability of home dialysis                               | 25 (24.5%) |
| Preference unknown                                                     | 3 (2.9%)   |
| No home visit*                                                         | 15 (14.7%) |
| <i>Therapy preference of nephrologist at time of referral (n=102)</i>  |            |
| Conservative treatment                                                 | 13 (12.7%) |
| Pre-emptive transplantation                                            | 11 (10.8%) |
| Transplantation, with temporary home PD                                | 17 (16.7%) |
| Transplantation, with temporary home HD                                | 5 (4.9%)   |
| Transplantation, with temporary CHD                                    | 12 (11.8%) |
| Peritoneal dialysis                                                    | 26 (25.5%) |
| Home haemodialysis                                                     | 3 (2.9%)   |
| In-centre haemodialysis                                                | 15 (14.7%) |

\* Patients that chose conservative treatment (n=10) or pre-emptive transplantation (n=5) at the start of the programme did not receive a home visit, their preference was deduced from their treatment choice.

Table S3. *Treatment recommendation or profile in MDM (n=102)*

All variables are presented in n (%), unless otherwise specified

|                                           |                   |
|-------------------------------------------|-------------------|
| <b>Pre-emptive transplantation</b>        | <b>6 (5.9%)</b>   |
| <b>Home dialysis</b>                      | <b>54 (52.9%)</b> |
| Transplantation + Home PD                 | 10 (9.8%)         |
| Transplantation + Active HHD*             | 6 (5.9%)          |
| Transplantation + Passive HHD**           | 0                 |
| Transplantation + Home PD / Active HHD*   | 9 (8.8%)          |
| Transplantation + Home PD / Passive HHD** | 0                 |
| Home PD                                   | 13 (12.7%)        |
| Active HHD*                               | 5 (4.9%)          |
| Passive HHD**                             | 0                 |
| Home PD / Active HHD*                     | 6 (5.9%)          |
| Home PD / Passive HHD**                   | 2 (2.0%)          |
| “Educate on all modalities” ***           | 3 (3.0%)          |
| <b>In-centre dialysis</b>                 | <b>32 (31.4%)</b> |
| Transplantation + In-centre HD            | 13 (12.7%)        |
| In-centre HD                              | 19 (18.6%)        |
| <b>Conservative treatment</b>             | <b>10 (9.8%)</b>  |

\* Active HHD: HHD with help from a patient’s partner or relatives

\*\* Passive HHD: HHD with help of home care

\*\*\* This recommendation is not consistent with the GUIDE programme

Table S4. *Treatment choice (n=92\*)*

All variables are presented in n (%), unless otherwise specified

|                                       |                   |
|---------------------------------------|-------------------|
| <b>Pre-emptive transplantation</b>    | <b>8 (8.7%)</b>   |
| <b>Home dialysis</b>                  | <b>31 (33.7%)</b> |
| Transplantation + Home PD             | 12 (13.0%)        |
| Transplantation + HHD, active/passive | 5 (5.4%)          |
| Home PD                               | 13 (14.1%)        |
| HHD, active/passive                   | 1 (1.1%)          |
| <b>In-centre dialysis</b>             | <b>42 (45.7%)</b> |
| Transplantation + In-centre HD        | 17 (18.5%)        |
| In-centre HD                          | 25 (27.2%)        |
| <b>Conservative treatment</b>         | <b>11 (12.0%)</b> |

\* 2 patients died before making a treatment choice, 8 patients had not made a treatment choice before 15 January 2015 (end of the study period)

Table S5. *First started therapy*

All variables are presented in n (%), unless otherwise specified

| <b>Therapy</b>                | <b>First started therapy (n=37)</b> |
|-------------------------------|-------------------------------------|
| (Pre-emptive) transplantation | 2 (5.4%)                            |
| Home PD                       | 8 (21.6%)                           |
| Home HD                       | 0                                   |
| In-centre HD                  | 27 (73.0%)                          |
